# Supplementary material for: UV-visible absorbance spectroscopy as a proxy for peatland dissolved organic carbon (DOC) quantity and quality: considerations on wavelength and absorbance degradation
Source: Royal Society of Chemistry journal article supplement (doi:10.1039/c4em00108g), 2014-01-01

### Supplementary Data

S1. p values and standard errors for all intercepts and gradients, for all six models from section 3.2 - alternative DOC proxy comparison. These correspond to figures 2, 3 and 4.

|                |                | Intercept | Intercept | Gradient | Gradient |
|----------------|----------------|-----------|-----------|----------|----------|
|                | Model          | SE        | P value   | SE       | P value  |
| Afon Ddu ditch | Spectre area   | 0.430     | 0.000     | 0.017    | 0.000    |
|                | Phenolics      | 1.291     | 0.654     | 0.051    | 0.000    |
|                | 254 nm         | 0.422     | 0.000     | 0.017    | 0.000    |
|                | 263 nm         | 0.416     | 0.000     | 0.016    | 0.000    |
|                | Tipping/Carter | 0.937     | 0.173     | 0.037    | 0.000    |
|                | 400 nm         | 0.786     | 0.000     | 0.031    | 0.000    |
|                |                |           |           |          |          |
| Afon Ddu pore  | Spectre area   | 2.398     | 0.700     | 0.051    | 0.000    |
|                | Phenolics      | 2.910     | 0.000     | 0.062    | 0.000    |
|                | 254 nm         | 2.377     | 0.177     | 0.051    | 0.000    |
|                | 230 nm         | 2.266     | 0.013     | 0.048    | 0.000    |
|                | Tipping/Carter | 1.843     | 0.033     | 0.039    | 0.000    |
|                | 400 nm         | 2.705     | 0.011     | 0.058    | 0.000    |
|                |                |           |           |          |          |
| Alwen streams  | Spectre area   | 1.006     | 0.407     | 0.059    | 0.000    |
|                | Phenolics      | 0.810     | 0.066     | 0.047    | 0.000    |
|                | 254 nm         | 0.913     | 0.283     | 0.053    | 0.000    |
|                | 230 nm         | 0.800     | 0.437     | 0.047    | 0.000    |
|                | Tipping/Carter | 0.738     | 0.012     | 0.043    | 0.009    |
|                | 400 nm         | 1.628     | 0.609     | 0.095    | 0.000    |
|                |                |           |           |          |          |

S2. Results of the two-wavelength model of Carter *et al.* (2012) using model parameters derived from our data (“parameterised”) and the parameters cited by Carter *et al.* The data is supplementary to table 4.

|              |                                 | Mean diff (mg L <sup>-1</sup> ) | Nash-Sutcliffe | Model R2 | RMSE  |
|--------------|---------------------------------|---------------------------------|----------------|----------|-------|
| Ditch water  | Parameterised                   | 1.69                            | 0.94           | 0.97     | 2.39  |
|              | Carter <i>et al.</i> parameters | 2.73                            | 87             | 0.93     | 3.36  |
| Pore water   | Parameterised                   | 3.2                             | 0.92           | 0.93     | 3.89  |
|              | Carter <i>et al.</i> parameters | 12.15                           | 0.1            | 0.93     | 13.43 |
| Stream water | Parameterised                   | 1.04                            | 0.98           | 0.97     | 1.44  |
|              | Carter <i>et al.</i> parameters | 1.75                            | 0.96           | 0.97     | 2.03  |

Model parameters used by Carter *et al.*, and the parameters used in our analysis.

| Carter <i>et al.</i> | A    | B    |
|----------------------|------|------|
| <b>E270</b>          | 69.3 | 15.4 |
| <b>E350</b>          | 30   | 0    |
| Ditch water          |      |      |
| <b>E270</b>          | 66   | 15.4 |
| <b>E350</b>          | 30   | 0    |
| Pore water           |      |      |
| <b>E270</b>          | 58.8 | 15.4 |
| <b>E350</b>          | 30   | 0    |
| Stream water         |      |      |
| <b>E270</b>          | 64.7 | 15.4 |
| <b>E350</b>          | 30   | 0    |

S3. The relationship between rainfall (total rainfall in the 30 days before each sampling trip) and water colour in ditches in the Afon Ddu catchment (using 400 nm as water colour),  $p = 0.02$ . Water becomes less coloured as rainfall increases. Data are from 25 sampling days between 29/10/2010 and 11/10/2012. Each data point is taken as the mean of absorbance at 400 nm for all twelve ditches. Rainfall data is taken from a site 27 km away, that is the same altitude as the Afon Ddu. Rainfall data belong to the Centre for Ecology and Hydrology, citation:

Sowerby, A., Emmett, B.A. (2014). Daily automated weather station (AWS) data from Climoor fieldsite in Clocaenog Forest. NERC-Environmental Information Data Centre doi:10.5285/01592784-807b-453a-ac52-0478ad616484.

Contains data supplied by Natural Environment Research Council.

©NERC (Centre for Ecology & Hydrology).

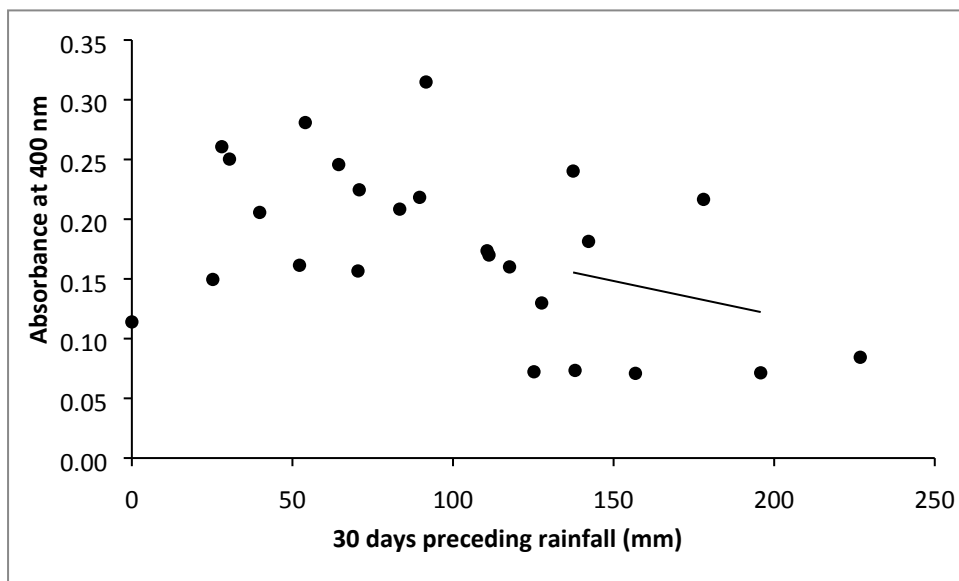

Supplement: c4em00108g1.pdf [file c4em00108g1.pdf]
